# Supplementary material for: To What Extent Do Fluorophores Bias the Biological Activity of Peptides? A Practical Approach Using Membrane-Active Peptides as Models
Source: PubMed Central journal article supplement (PMC7509492; doi:10.3389/fbioe.2020.552035), 2020-09-09
Supplement: Data_Sheet_1.pdf [file Data_Sheet_1.pdf]

## *Supplementary Material*

**Table S1.** Properties of the selected fluorophores

| Fluorophore             | Molecular weight (Da) | Charge | $\lambda_{exc}$ (nm) | $\lambda_{em}$ (nm) | Extinction coefficient ( $M^{-1}.cm^{-1}$ ) | Quantum yield | Brightness <sup>1</sup> | logP <sup>2</sup> | pKa <sup>2</sup> |
|-------------------------|-----------------------|--------|----------------------|---------------------|---------------------------------------------|---------------|-------------------------|-------------------|------------------|
| 5(6)-Carboxyfluorescein | 376.32                | -1     | 492                  | 514                 | 82,000                                      | 0.70          | 57,400                  | 3.09              | 8.21             |
| Rhodamine B             | 479.02                | 0      | 546                  | 568                 | 106,000                                     | 0.60          | 63,600                  | 5.42              | 3.40             |
| Quasar 570              | 471.65                | +1     | 548                  | 570                 | 115,000                                     | N.D.          | N.D.                    | 6.37              | 4.71             |
| Tide Fluor 3            | 559.70                | 0      | 546                  | 571                 | 85,000                                      | 0.80          | 68,000                  | N.D.              | N.D.             |

$\lambda$ , wavelength; LogP, partition coefficient; N.D., not defined

<sup>1</sup>Calculated using the following formula: Extinction coefficient  $\times$  Quantum yield

<sup>2</sup>Calculated using the Chem3D software (PekinElmer\_Informatics)

**Table S2.** Properties of all selected peptides. The peptide sequence of each peptide was run in the Peptide Property Calculator (ver 3.1) (bioSYNTHESIS, 2013)

| Application         | Peptide    | Physicochemical Properties |            |                                                             |                   |                            |
|---------------------|------------|----------------------------|------------|-------------------------------------------------------------|-------------------|----------------------------|
|                     |            | Number of Residues         | Net Charge | Extinction coefficient (M <sup>-1</sup> .cm <sup>-1</sup> ) | Isoelectric point | Hydrophobicity (at pH 7.0) |
| BBB peptide shuttle | PepH3      | 7                          | +2         | 5,690                                                       | 14.00             | 42.86                      |
|                     | PepNeg     | 7                          | -2         | 1,280                                                       | 4.15              | -0.14                      |
| AMP                 | vCPP2319   | 20                         | +16        | 18,350                                                      | 13.25             | 4.90                       |
|                     | Ctn[15-34] | 20                         | +8         | 0                                                           | 14.00             | 29.30                      |

BIOSYNTHESIS 2013. Peptide Property Calculator.

**Table S3.** Peptides synthesized

| Peptide    | Amino acid sequence             | Modification | Mass (Da),<br>calculated (found) | HPLC t <sub>R</sub><br>(min) <sup>1</sup> | Purity<br>(%) |
|------------|---------------------------------|--------------|----------------------------------|-------------------------------------------|---------------|
| PepH3      | AGILKRW-amide                   | none         | 842.8 (843.0)                    | 5.5                                       | 99.5          |
|            | CF-AGILKRW-amide                | Fluorophore  | 1,199.4 (1,201.4)                | 6.3                                       | 96.3          |
|            | RhB-AGILKRW-amide               | Fluorophore  | 1,302.1 (1,303.7)                | 8.8                                       | 99.4          |
|            | Q570-AGILKRW-amide              | Fluorophore  | 1,294.7 (1,295.6)                | 6.3                                       | 99.6          |
|            | TF3-AGILKRW-amide               | Fluorophore  | 1,382.8 (1,382.6)                | 7.4                                       | 95.2          |
| PepNeg     | SGTQEY-amide                    | none         | 811.8 (812.3)                    | 4.5                                       | 99.5          |
|            | CF-SGTQEY-amide                 | Fluorophore  | 1,169.1 (1,171.4)                | 3.8                                       | 99.1          |
|            | RhB-SGTQEY-amide                | Fluorophore  | 1,271.8 (1,272.0)                | 3.8                                       | 95.3          |
|            | Q570-SGTQEY-amide               | Fluorophore  | 1,264.4 (1,265.0)                | 5.6                                       | 99.6          |
|            | TF3-SGTQEY-amide                | Fluorophore  | 1,352.5 (1,353.1)                | 7.7                                       | 99.3          |
| vCPP2319   | WRRRYRRWRRRRRWRRRPRR-amide      | none         | 3,177.8 (3,176.8)                | 6.9                                       | 99.1          |
|            | CF-WRRRYRRWRRRRRWRRRPRR-amide   | Fluorophore  | 3,536.1 (3,537.8)                | 7.8                                       | 98.1          |
|            | RhB-WRRRYRRWRRRRRWRRRPRR-amide  | Fluorophore  | 3,638.8 (3,639.4)                | 6.9                                       | 98.5          |
|            | Q570-WRRRYRRWRRRRRWRRRPRR-amide | Fluorophore  | 3,631.4 (3,631.8)                | 8.9                                       | 99.7          |
|            | TF3-WRRRYRRWRRRRRWRRRPRR-amide  | Fluorophore  | 3,719.5 (3,719.6)                | 6.1                                       | 97.0          |
| Ctm[15-34] | KKRLKKIFKKPMVIGVTIPF-amide      | none         | 2,370.1 (2,369.5)                | 7.5                                       | 98.8          |
|            | CF-KKRLKKIFKKPMVIGVTIPF-amide   | Fluorophore  | 2,728.4 (2,728.8)                | 7.2                                       | 96.6          |
|            | RhB-KKRLKKIFKKPMVIGVTIPF-amide  | Fluorophore  | 2,831.1 (2,831.7)                | 7.8                                       | 99.1          |
|            | Q570-KKRLKKIFKKPMVIGVTIPF-amide | Fluorophore  | 2,823.8 (2,823.7)                | 11.9                                      | 96.4          |
|            | TF3-KKRLKKIFKKPMVIGVTIPF-amide  | Fluorophore  | 2,911.8 (2,911.5)                | 6.2                                       | 95.2          |

<sup>1</sup>See experimental part for details

**PepH3**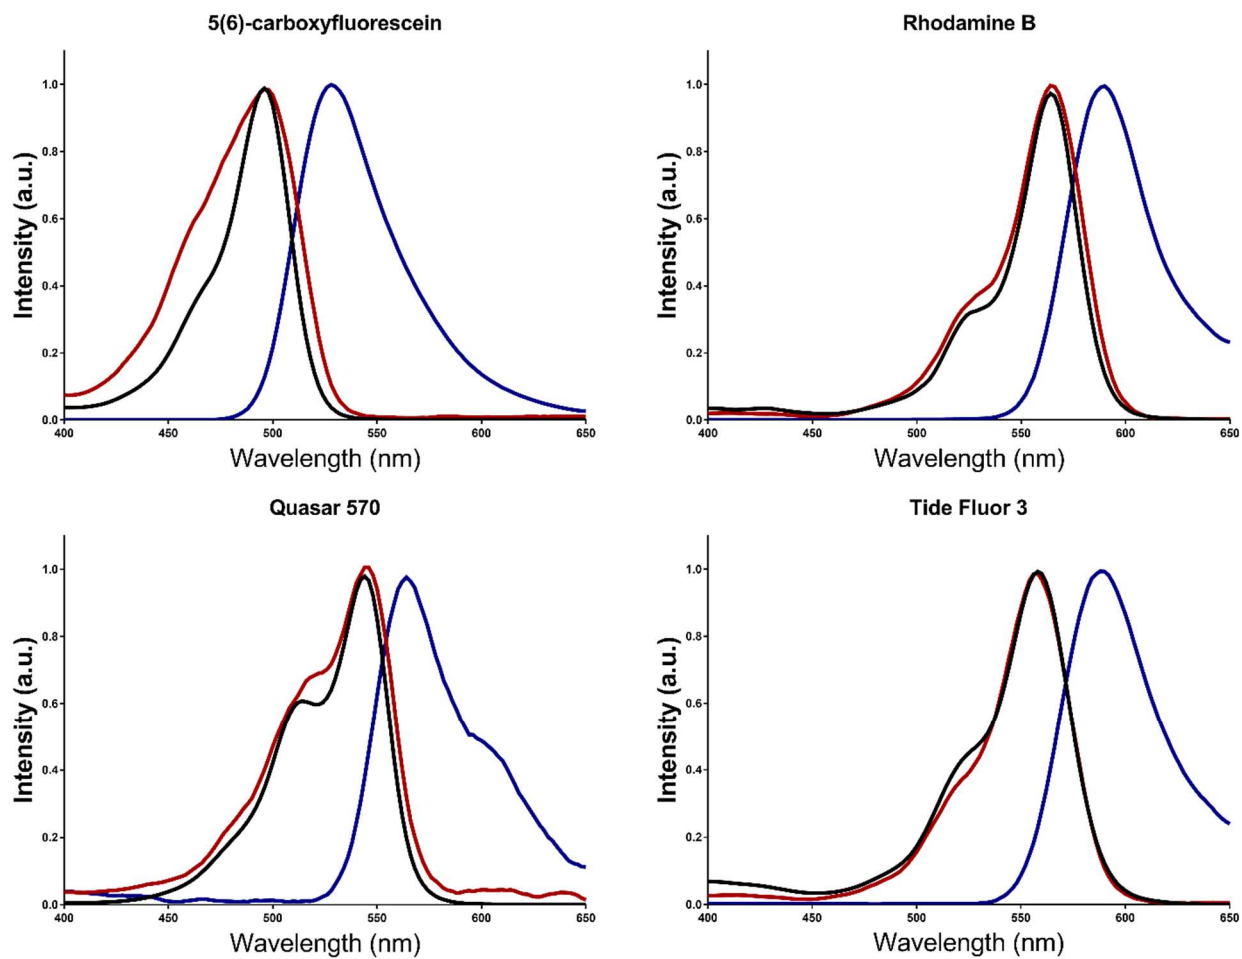

**Figure S1 Spectrum of PepH3 derivatives.** Black line – absorbance; red line – fluorescent excitation; and blue line – fluorescent emission.

## PepNeg

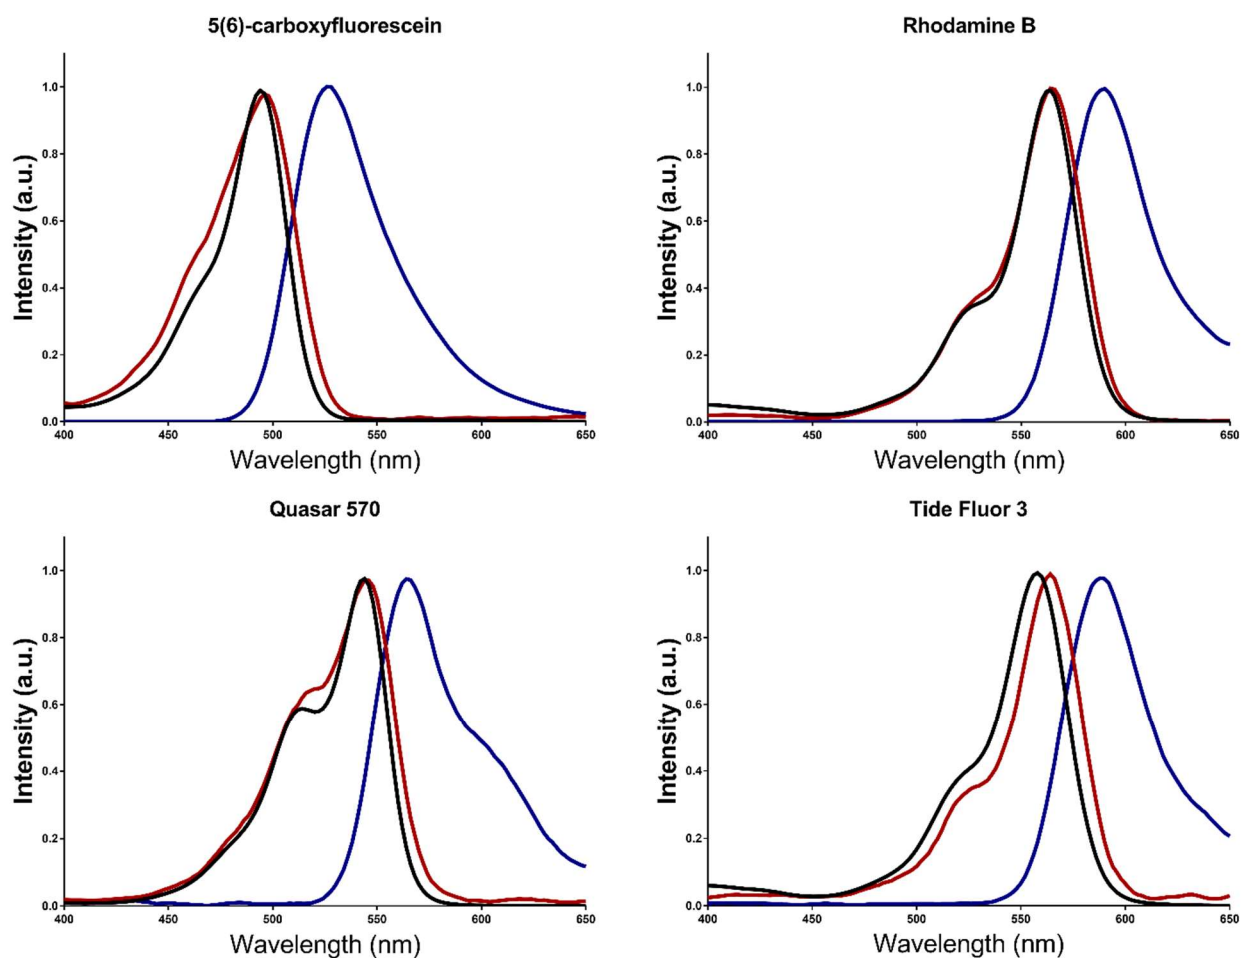

**Figure S2 Spectrum of PepNeg derivatives.** Black line – absorbance; red line – fluorescent excitation; and blue line – fluorescent emission.

**vCPP2319**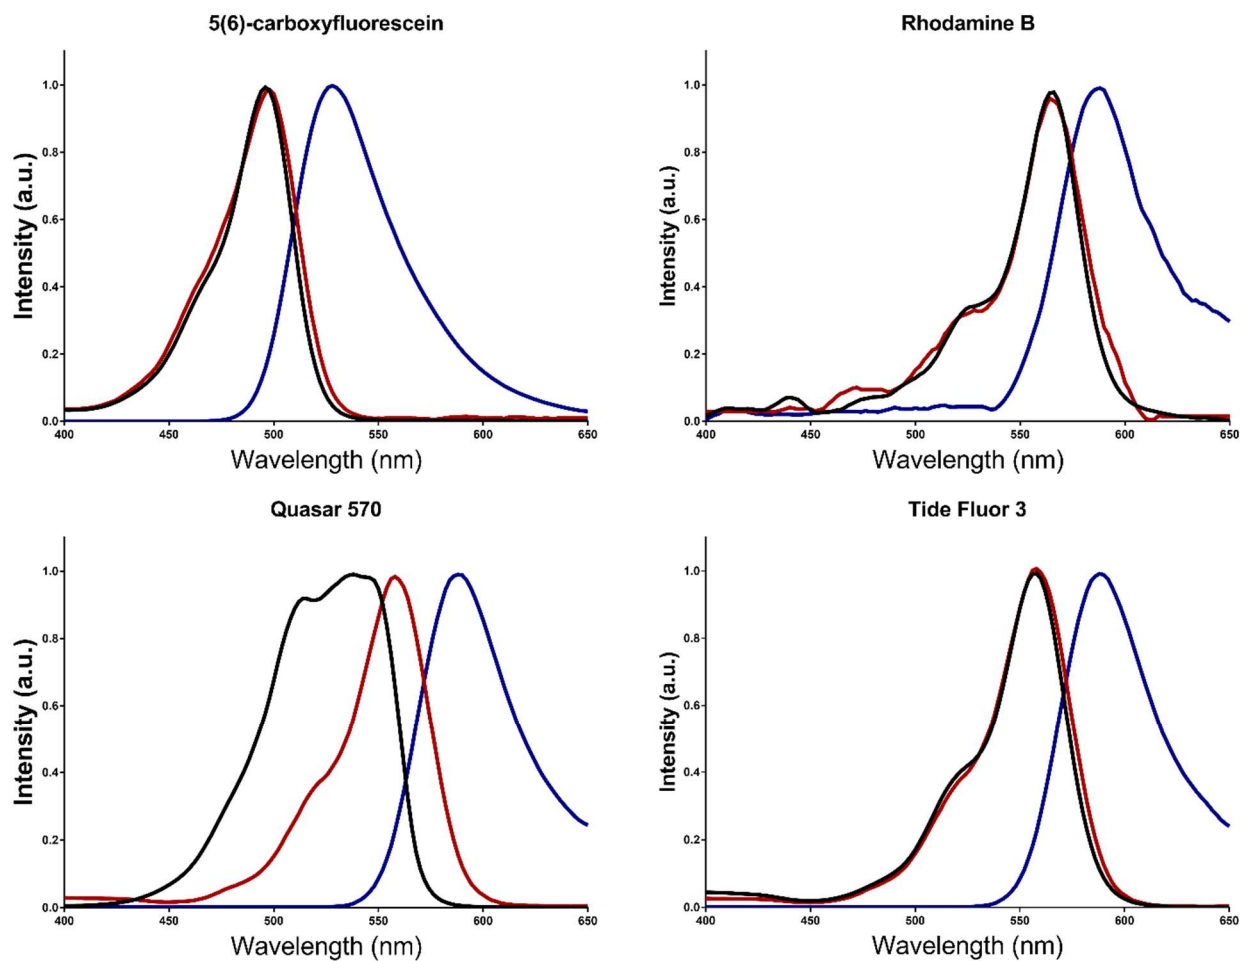

**Figure S3 Spectrum of vCPP2319 derivatives.** Black line – absorbance; red line – fluorescent excitation; and blue line – fluorescent emission.

## Ctn[15-34]

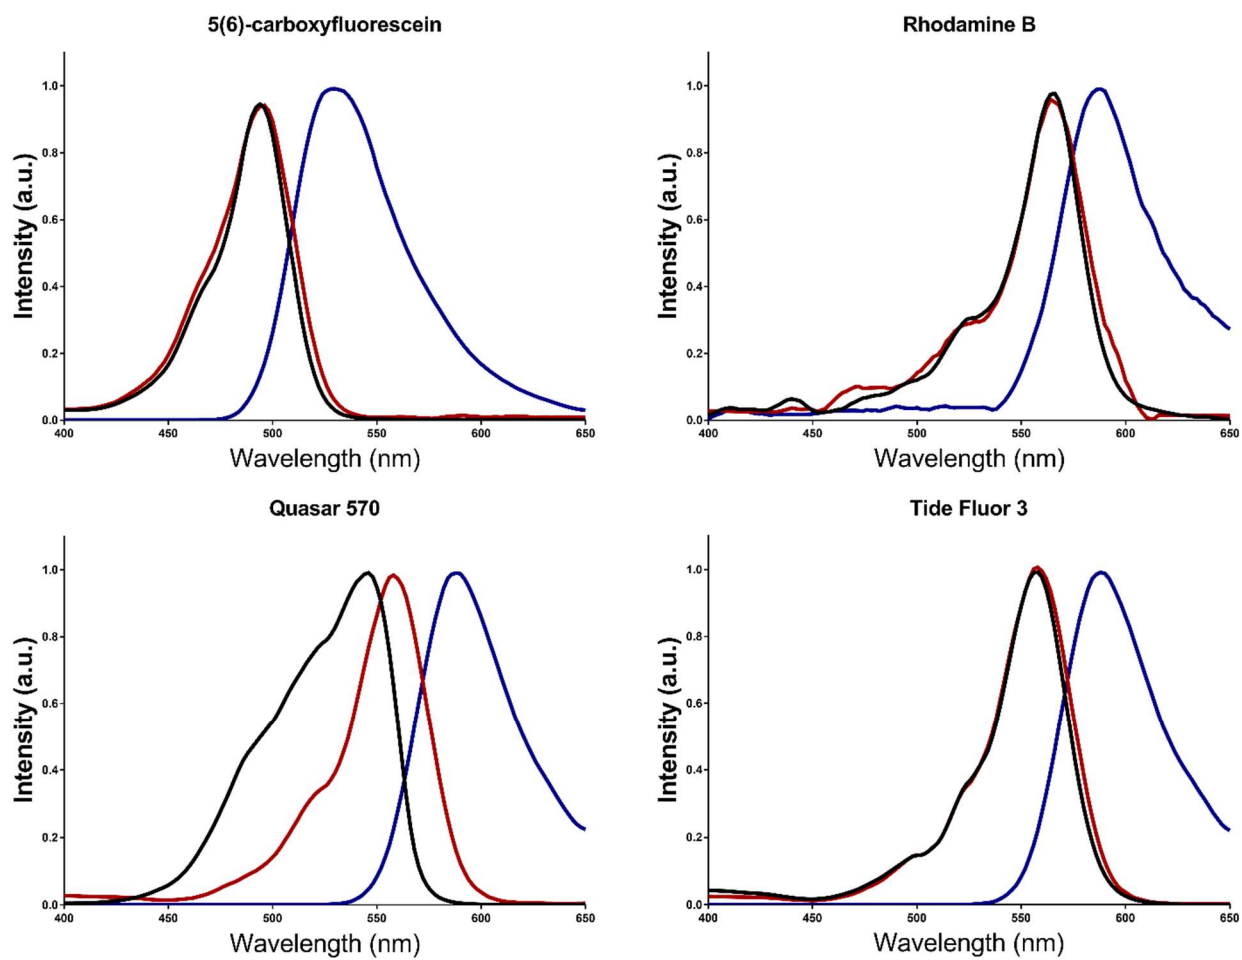

**Figure S4 Spectrum of Ctn[15-34] derivatives.** Black line – absorbance; red line – fluorescent excitation; and blue line – fluorescent emission.

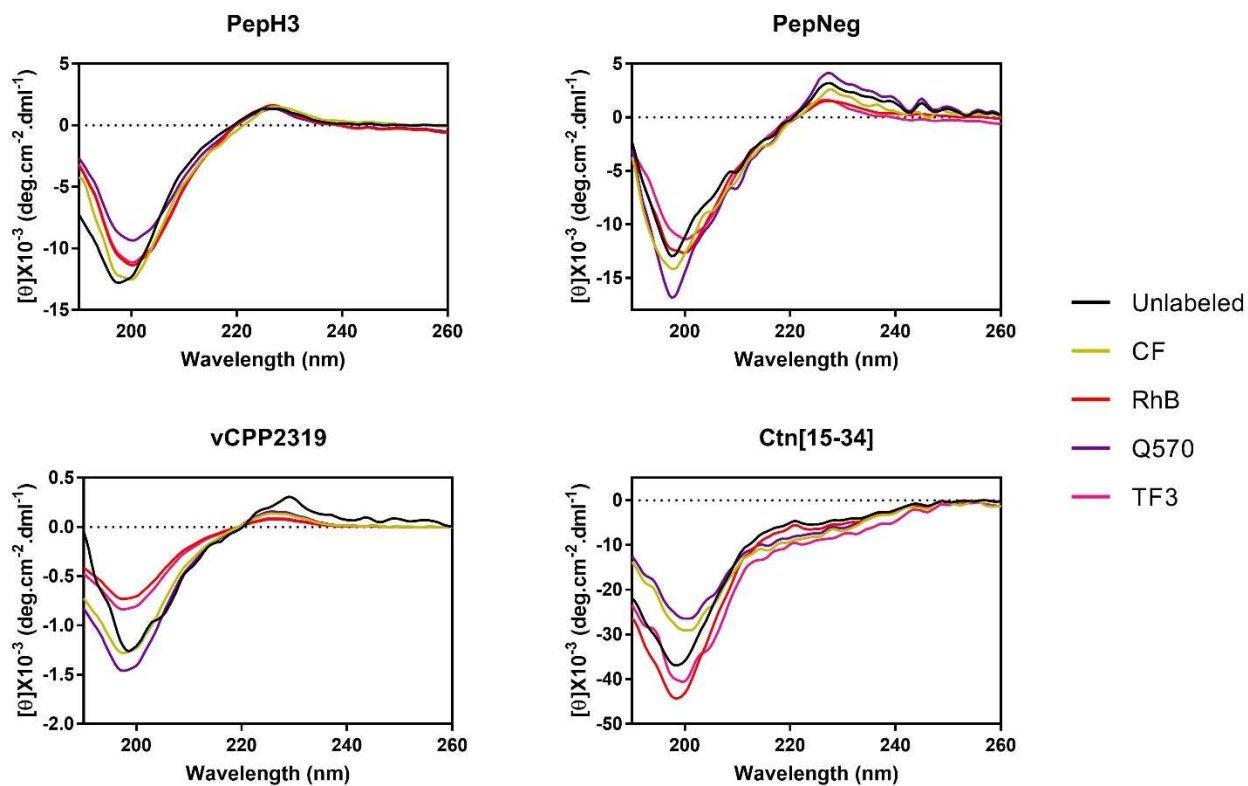

**Figure S5 Secondary structure of unlabeled- and labeled-peptides.** In phosphate buffer solution, the spectra of all peptides were characteristic of random-coil conformation. Upon derivatization, no changes were observed.



## Effect of fluorophores on the peptide structure

The secondary structure of peptides is important for their activity. (Sani and Separovic, 2018, Liu et al., 2018) Therefore, it is vital to understand the effect that a fluorophore might have on peptides secondary structure rearrangements. CD is a robust and reliable technique that allows this evaluation. (Bakshi et al., 2014, Greenfield, 2006) Thus, we performed CD to determine the influence of fluorophores on the secondary rearrangement of peptides. Firstly, we analyzed the conformation of unlabeled-peptides in phosphate buffer at 25°C. Then, we compared this conformation to the results obtained upon derivatization (Figure S5). Both unlabeled- and labeled-peptides show a random coil conformation. Thus, although some fluorophores are bulky and rigid, these results show that none of the fluorophores induces a conformational change in solution for peptides described as BBB peptide shuttles (PepH3 and PepNeg), or AMPs (vCPP2319 and Ctn[15-34]).

BAKSHI, K., LIYANAGE, M. R., VOLKIN, D. B. & MIDDAUGH, C. R. 2014. Circular Dichroism of Peptides. *In: NIXON, A. E. (ed.) Therapeutic Peptides: Methods and Protocols*. Totowa, NJ: Humana Press.

GREENFIELD, N. J. 2006. Using circular dichroism spectra to estimate protein secondary structure. *Nature protocols*, 1, 2876-2890.

LIU, S., BAO, J., LAO, X. & ZHENG, H. 2018. Novel 3D Structure Based Model for Activity Prediction and Design of Antimicrobial Peptides. *Scientific Reports*, 8, 11189.

SANI, M.-A. & SEPAROVIC, F. 2018. Antimicrobial Peptide Structures: From Model Membranes to Live Cells. *Chemistry – A European Journal*, 24, 286-291.

**Table S4.** Interaction of unlabeled- and labeled-peptides with RBCs. 1.0% (v/v) of RBCs were incubated with different concentrations of unlabeled- and labeled-peptides (range from 0.01 – 100  $\mu$ M).

| Peptide           | Fluorophore             | Hemolytic activity (HC $_{50\pm SD}$ $\mu$ M) |                   |                  |
|-------------------|-------------------------|-----------------------------------------------|-------------------|------------------|
|                   |                         | HC $_{10}$                                    | HC $_{50}$        | HC $_{90}$       |
| <b>PepH3</b>      | -                       | >200                                          | >200              | >200             |
|                   | 5(6)-Carboxyfluorescein | >200                                          | >200              | >200             |
|                   | Rhodamine B             | 9.208 $\pm$ 1.564                             | 128.3 $\pm$ 6.596 | >200             |
|                   | Quasar 570              | >200                                          | >200              | >200             |
|                   | Tide Fluor 3            | >200                                          | >200              | >200             |
| <b>PepNeg</b>     | -                       | >200                                          | >200              | >200             |
|                   | 5(6)-Carboxyfluorescein | >200                                          | >200              | >200             |
|                   | Rhodamine B             | >200                                          | >200              | >200             |
|                   | Quasar 570              | >200                                          | >200              | >200             |
|                   | Tide Fluor 3            | >200                                          | >200              | >200             |
| <b>vCPP2319</b>   | -                       | >200                                          | >200              | >200             |
|                   | 5(6)-Carboxyfluorescein | >200                                          | >200              | >200             |
|                   | Rhodamine B             | 2.43 $\pm$ 0.321                              | 23.88 $\pm$ 2.236 | >200             |
|                   | Quasar 570              | 7.79 $\pm$ 1.569                              | 51.57 $\pm$ 4.612 | >200             |
|                   | Tide Fluor 3            | 2.83 $\pm$ 0.969                              | >200              | >200             |
| <b>Ctn[15-34]</b> | -                       | >200                                          | >200              | >200             |
|                   | 5(6)-Carboxyfluorescein | >200                                          | >200              | >200             |
|                   | Rhodamine B             | 3.29 $\pm$ 1.321                              | 61.43 $\pm$ 4.326 | >200             |
|                   | Quasar 570              | 12.54 $\pm$ 3.263                             | 193.8 $\pm$ 8.697 | >200             |
|                   | Tide Fluor 3            | 102.0 $\pm$ 6.196                             | >200              | >200             |
| <b>Melittin</b>   | -                       | 0.16 $\pm$ 0.025                              | 0.78 $\pm$ 0.354  | 3.84 $\pm$ 0.961 |

HC $_{10}$ , HC $_{50}$ , and HC $_{90}$  were defined as the concentration of peptide causing 10%, 50%, and 90% hemolysis on erythrocytes, respectively.

**Table S5.** Cytotoxicity of unlabeled- and labeled-peptides with human cells  $1.5 \times 10^4$  and  $1.0 \times 10^4$  cells of HBEC-5i and MDA-MB-231 cell lines, respectively, were incubated with different concentrations of unlabeled- and labeled-peptides (range from 0.01 – 100  $\mu$ M).

| Cell line  | Peptide    | Fluorophore             | Cytotoxicity activity (IC <sub>50</sub> ±SD $\mu$ M) |                  |                  |
|------------|------------|-------------------------|------------------------------------------------------|------------------|------------------|
|            |            |                         | IC <sub>10</sub>                                     | IC <sub>50</sub> | IC <sub>90</sub> |
| HBEC-5i    | -          | -                       | >200                                                 | >200             | >200             |
|            | PepH3      | 5(6)-Carboxyfluorescein | >200                                                 | >200             | >200             |
|            |            | Rhodamine B             | >200                                                 | >200             | >200             |
|            |            | Quasar 570              | >200                                                 | >200             | >200             |
|            |            | Tide Fluor 3            | 184.9±6.569                                          | >200             | >200             |
|            |            | -                       | >200                                                 | >200             | >200             |
|            | PepNeg     | 5(6)-Carboxyfluorescein | >200                                                 | >200             | >200             |
|            |            | Rhodamine B             | >200                                                 | >200             | >200             |
|            |            | Quasar 570              | >200                                                 | >200             | >200             |
|            |            | Tide Fluor 3            | >200                                                 | >200             | >200             |
| -          |            | >200                    | >200                                                 | >200             |                  |
| MDA-MB-231 | -          | -                       | 1.22±0.521                                           | 5.02±1.041       | 20.63±2.103      |
|            | vCPP2319   | 5(6)-Carboxyfluorescein | 1.26±0.236                                           | 4.72±0.938       | 18.76±1.874      |
|            |            | Rhodamine B             | 1.13±0.641                                           | 4.11±1.045       | 16.63±1.312      |
|            |            | Quasar 570              | 1.14±0.345                                           | 4.26±1.027       | 16.00±1.942      |
|            |            | Tide Fluor 3            | 1.05±0.210                                           | 4.30±0.035       | 17.03±1.582      |
|            |            | -                       | 4.76±1.564                                           | >200             | >200             |
|            | Ctn[15-34] | 5(6)-Carboxyfluorescein | 4.23±1.023                                           | >200             | >200             |
|            |            | Rhodamine B             | 2.97±0.984                                           | >200             | >200             |
|            |            | Quasar 570              | 3.08±1.221                                           | 144.0±4.213      | >200             |
|            |            | Tide Fluor 3            | 2.57±1.369                                           | 122.7±3.845      | >200             |
| -          |            | >200                    | >200                                                 | >200             |                  |

IC<sub>10</sub>, IC<sub>50</sub>, and IC<sub>90</sub> were defined as the concentration of peptide causing 10%, 50%, and 90% death on human cells, respectively.
